# Supplementary material for: DFT characterization of a new possible two-dimensional BN allotrope with a biphenylene network structure
Source: Royal Society of Chemistry journal article supplement (doi:10.1039/d2cp05995a), 2023-01-01
Supplement: d2cp05995a1.pdf [file d2cp05995a1.pdf]

Supplementary Materials for

## **DFT characterization of a new possible two-dimensional BN allotrope with a biphenylene network structure**

Yang Han<sup>1,2\*</sup>, Tingxiang Hu<sup>1</sup>, Xiaochuang Liu<sup>1</sup>, Shijie Jia<sup>1,2</sup>, Hangbing Liu<sup>1</sup>, Junyu Hu<sup>1</sup>, Guolei Zhang<sup>2</sup>,

Longbin Yang<sup>1,2</sup>, Guo Hong<sup>3</sup>, Yi-Tung Chen<sup>4</sup>

<sup>1</sup>*Qingdao Innovation and Development Center of Harbin Engineering University, 266400 Qingdao, China*

<sup>2</sup>*College of Power and Energy Engineering, Harbin Engineering University, 150001 Harbin, China*

<sup>3</sup>*Department of Materials Science and Engineering & Center of Super-Diamond and Advanced Films,  
College of Engineering, City University of Hong Kong, 83 Tat Chee Avenue, Kowloon, Hong Kong SAR 999077,  
China.*

<sup>4</sup>*Department of Mechanical Engineering, University of Nevada, Las Vegas, NV 89154, USA*

This file includes:

Supplementary discussion (Sec. 1):

1. Layered configuration design

Table S1

Supplementary Figures S1-S2

## 1. Layered configuration design

The 6 considered different possible construction patterns were obtained by displacing the second layer of *pb*n-BN in *a* and *b* lattice directions with the relative rotational angle  $\alpha$  as another adjustable variable. All the representative *a*, *b* and  $\alpha$  quantities selected based on geometric structure symmetry were listed in Tab. 1 with all obtained configurations given in Fig. S1. The initial layer distance was set at a layer thickness of single layer *h*-BN ( $\sim 3.4$  Å). Then the total energy of the 6 independent bilayer structures with different layer distances were calculated as shown in Fig. S2.

Table S1 The 6 different representative  $a$ ,  $b$  and  $\alpha$  quantities selected used in design of the double layer structure of  $pbn$ -BN and the corresponding lowest total energy after optimizing the distance between the two layers.

| No. | Quant | Displacement $a$ | Displacement $b$ | Angle $\alpha$ ( $\pi$ ) | Energy (eV)     |
|-----|-------|------------------|------------------|--------------------------|-----------------|
| 1   |       | 0                | 0                | 0                        | -204.362        |
| 2   |       | 0.5              | 0                | 0                        | <b>-204.374</b> |
| 3   |       | 0                | 0.5              | 0                        | -204.371        |
| 4   |       | 0.5              | 0.5              | 0                        | -204.364        |
| 5   |       | 0.25             | 0.5              | 0                        | -204.367        |
| 6   |       | 0.25             | 0.5              | 1.0                      | -204.366        |

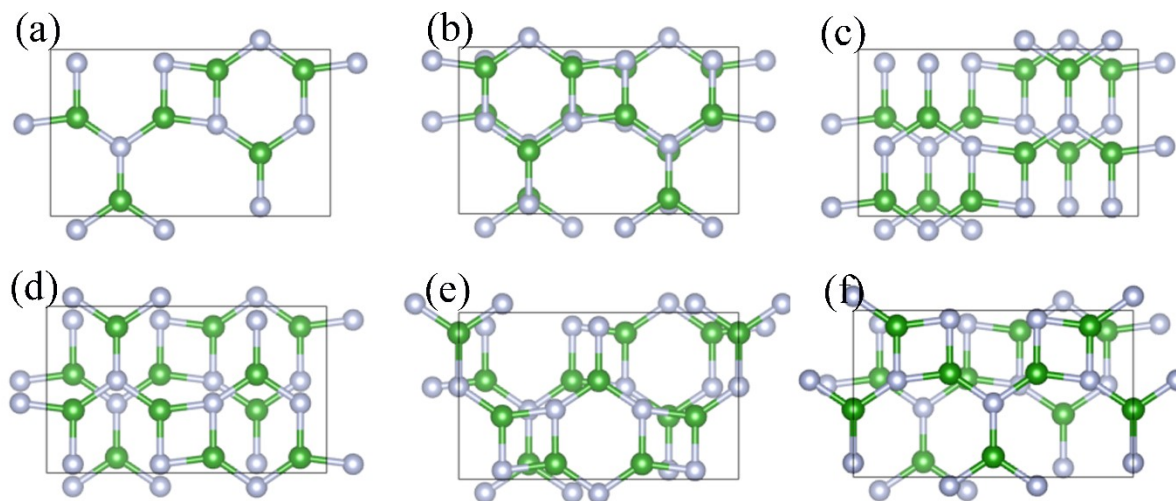

Figure S1 The 6 configurations corresponding to the representative considered  $a$ ,  $b$  and  $\alpha$  quantities selected based on geometric structure symmetry listed in Tab. 1.

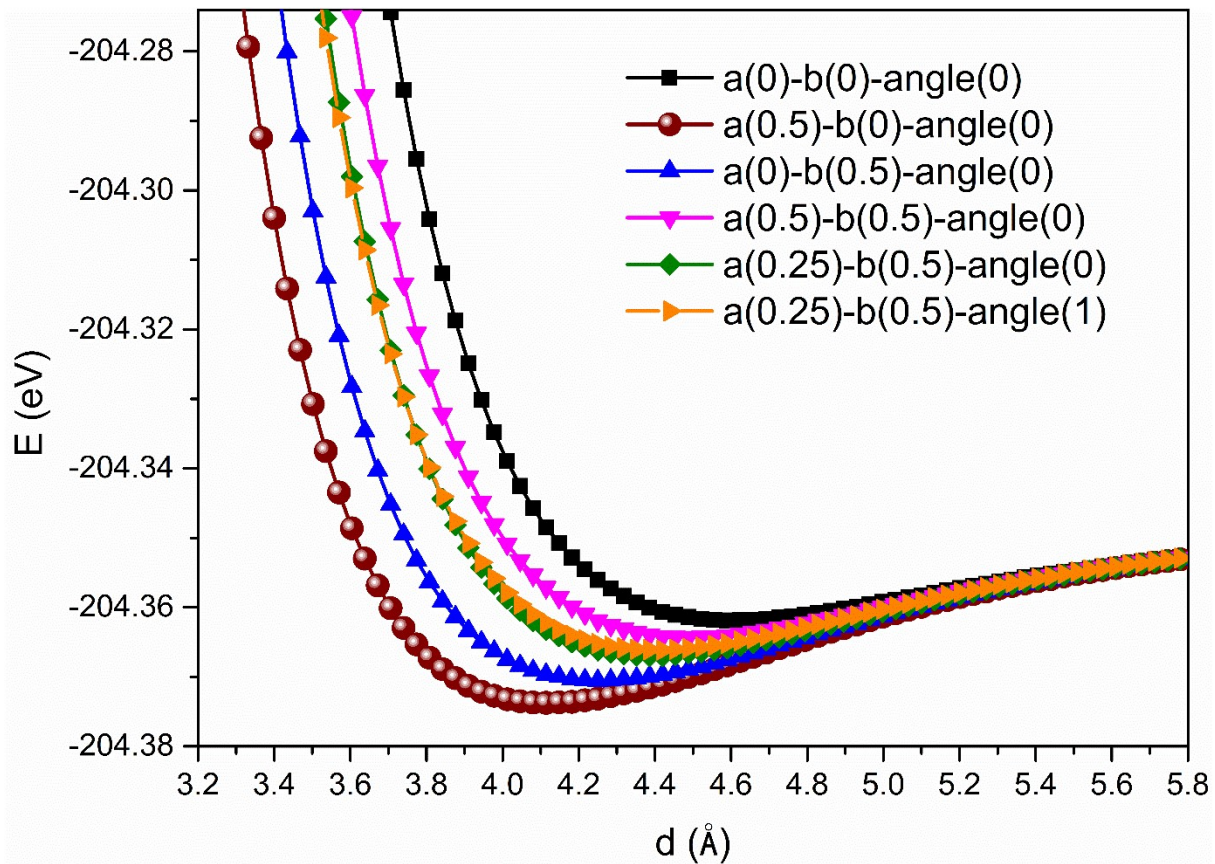

Figure S2 The total energy  $E$  change versus the layer distance  $d$  between the two layers in a bilayer *bpn-BN* structure. The 6 independent  $a$ ,  $b$  and  $\alpha$  quantities are given in the legends.
